# Supplementary material for: Fertilizers and Fertilization Strategies Mitigating Soil Factors Constraining Efficiency of Nitrogen in Plant Production
Source: MDPI journal article supplement (doi:10.3390/plants11141855), 2022-07-15
Supplement: s1 [file s1]

# Supplementary material

## Fertilizers as means of production mitigating soil factors constraining efficiency of nitrogen in plant production

Przemysław Barłóg<sup>1\*</sup>, Witold Grzebisz<sup>1</sup> and Remigiusz Łukowiak<sup>1</sup>

Department of Agricultural Chemistry and Environmental Biogeochemistry, Poznan University of Life Sciences, Wojska Polskiego 71F, 60-625 Poznan, Poland; witold.grzebisz@up.poznan.pl (W.G.); remigiusz.lukowiak@up.poznan.pl (R.Ł.)

\* Correspondence: przemyslaw.barlog@up.poznan.pl; Tel.: +48-618-48-77-88 (P.B.)

**Table S1.** A detailed analysis and evaluation of agronomic factors responsible for nitrogen gap (NG)\*

| Field characteristics                    | Field number → decreasing Nitrogen Gap |               |               |               |
|------------------------------------------|----------------------------------------|---------------|---------------|---------------|
|                                          | 13                                     | 10            | 5             | 14            |
| N <sub>i</sub> rate, kg ha <sup>-1</sup> | 150                                    | 160           | 130           | 130           |
| Nitrogen gap/gain, kg N ha <sup>-1</sup> | −59                                    | −40           | −14           | +4            |
| Yield gap/gain, kg ha <sup>-1</sup>      | −3729                                  | −2664         | −858          | +242          |
| Soil usability class                     | Very low                               | Low           | Low           | Low           |
| Fore-crop                                | Low                                    | Medium        | Medium        | Medium        |
| Variety                                  | Extensive                              | Extensive     | Extensive     | Extensive     |
| Sowing term                              | Adequate                               | Adequate      | Adequate      | Adequate      |
| Manure                                   | Lack                                   | Lack          | Lack          | Lack          |
| Soil reaction (pH)                       | Acidic                                 | Slightly acid | Slightly acid | Slightly acid |
| Phosphorus content – class               | Medium                                 | Medium        | Medium        | Medium        |
| Potassium content – class                | Low                                    | High          | Medium        | High          |
| Magnesium content class                  | Medium                                 | Medium        | Low           | Medium        |
| Fungicide protection                     | Medium                                 | Medium        | Medium        | Medium        |

Key: Low, Medium, High, Adequate, – a relative range of the growth factor.; Acidic, slightly acid, neutral – ranges of soil pH.

\*The calculation NG procedure consists of a set of formulas:

- Partial Factor Productivity of N<sub>i</sub>:  $PFP_{N_f} = \frac{Y_a}{N_f}$  (kg kg<sup>-1</sup> N<sub>i</sub>)
- Attainable, maximum yield:  $Y_{attmax} = cPFP_{N_f} \times N_f$  (t or kg ha<sup>-1</sup>)
- Yield Gap:  $YG = Y_{attmax} - Y_a$  (t ha<sup>-1</sup>)
- Nitrogen Gap:  $NG = \frac{YG}{cPFP_{N_f}}$  (kg N ha<sup>-1</sup>)

where: PFP<sub>N<sub>f</sub></sub> – partial factor productivity of N<sub>i</sub>, kg grain/seeds, tubers etc. per kg N<sub>i</sub>; Y<sub>a</sub> – actual yield of a currently grown crop, t ha<sup>-1</sup>; N<sub>f</sub> – the amount of applied fertilizer N, kg ha<sup>-1</sup>; Y<sub>attmax</sub> – the maximum attainable yield, t ha<sup>-1</sup>; cPFP<sub>N<sub>f</sub></sub> – the average of the third quartile (Q3) of the set of PFP<sub>N<sub>f</sub></sub> indices arranged in ascending order, kg grain/seeds, tubers etc. per kg N<sub>i</sub>; YG – yield gap, t ha<sup>-1</sup>; NG – nitrogen gap, kg ha<sup>-1</sup> of N.
